# Supplementary material for: Alloying promotion of Pd-based metallenes in electrocatalytic hydrogenation of functionalized nitroarenes
Source: Royal Society of Chemistry journal article supplement (doi:10.1039/d2ta10021e), 2023-01-01
Supplement: d2ta10021e1.pdf [file d2ta10021e1.pdf]

**Electronic supplementary information (ESI) for Journal of Materials Chemistry A**

This journal is © The Royal Society of Chemistry

**Alloying promotion of Pd-based metallenes in electrocatalytic hydrogenation of functionalized nitroarenes**

Wenbiao Zhang,<sup>a,b</sup> Wanling Zhang,<sup>a</sup> Jingwen Tan,<sup>a</sup> Di Pan,<sup>b</sup> Yi Tang<sup>\*,b</sup> and Qingsheng Gao<sup>\*,a</sup>

<sup>a</sup> College of Chemistry and Materials Science, Guangdong Provincial Key Laboratory of Functional Supramolecular Coordination Materials and Applications, Jinan University, Guangzhou 510632, P. R. China. E-mail: [tqsgao@jnu.edu.cn](mailto:tqsgao@jnu.edu.cn)

<sup>b</sup> Department of Chemistry, Shanghai Key Laboratory of Molecular Catalysis and Innovative Materials, Laboratory of Advanced Materials and Collaborative Innovation Center of Chemistry for Energy Materials, Fudan University, Shanghai 200433, China. E-mail: [yitang@fudan.edu.cn](mailto:yitang@fudan.edu.cn)

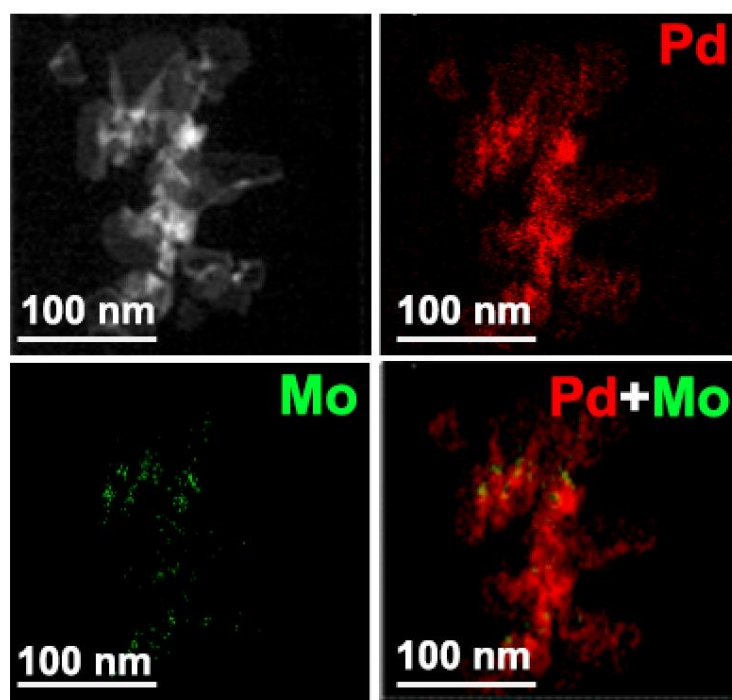

**Fig. S1** EDS elemental mapping of Pd and Mo in Pd-Mo metallene.

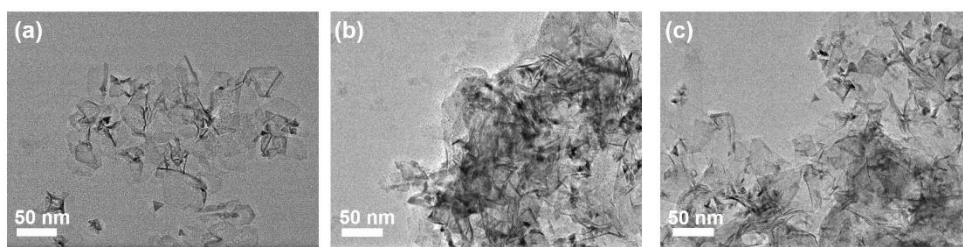

**Fig. S2** TEM images of Pd-Mo metallenes obtained after varying the feeding content of  $\text{Mo}(\text{CO})_6$  (a: 2 mg, b: 10 mg, c: 15 mg.) along with the fixed one of  $\text{Pd}(\text{ac})_2$  (12 mg).

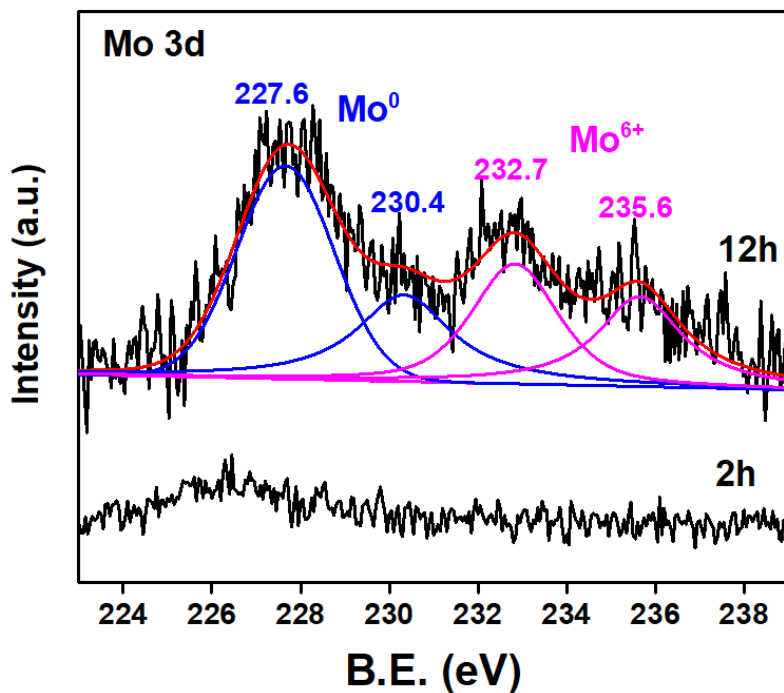

**Fig. S3** Mo 3d XPS of Pd-Mo metallene received at different time during preparation. The presence of  $\text{Mo}^{6+}$  is due to the slight surface oxidation when the sample is exposed to air.

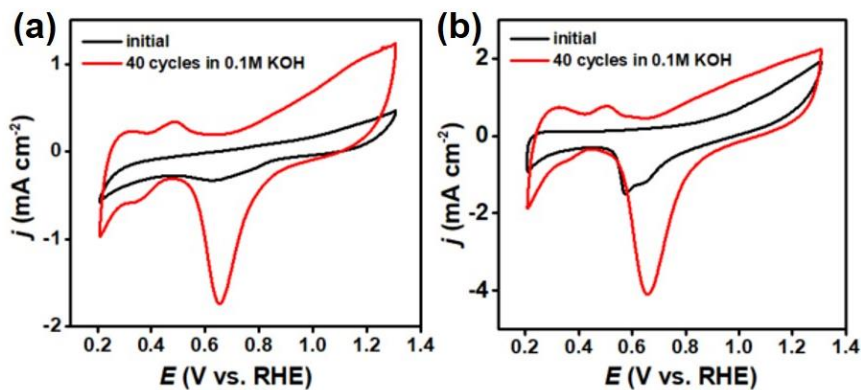

**Fig. S4** CVs of (a) Pd and (b) Pd-Mo metallenes before and after surface cleaning by repeated CVs in 0.1 M KOH.

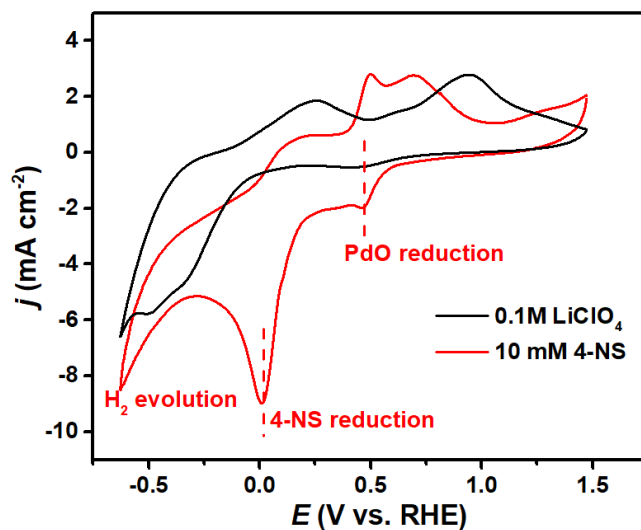

**Fig. S5** CV curves of Pd-Mo in 0.1 M LiClO<sub>4</sub> (pH 6.8) before and after introducing 4-NS (10 mM). For this test, Pd-Mo metallene was dropped onto a glassy carbon electrode.

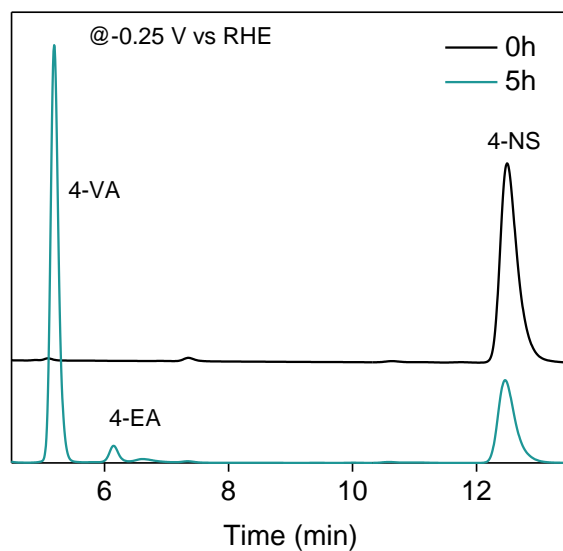

**Fig S6** HPLC profiles of liquid products received after the ECH.

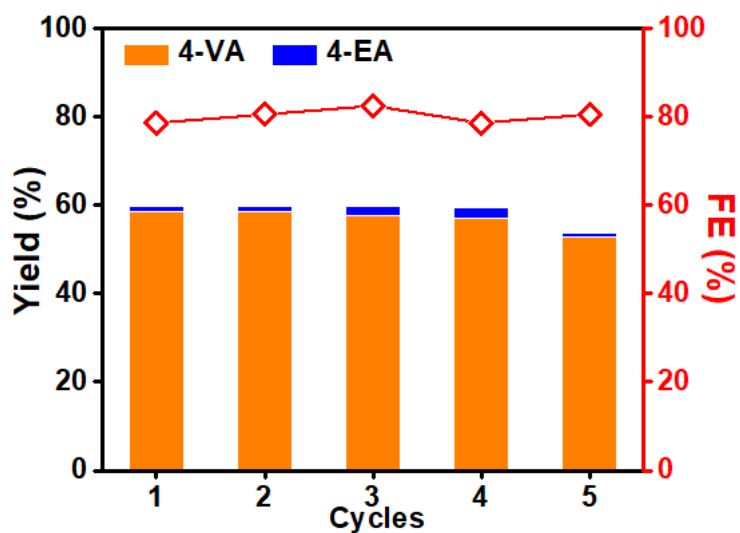

**Fig. S7** Cycle test for the ECH of 4-NS over Pd-Mo metallene at  $-0.25$  V vs. RHE.

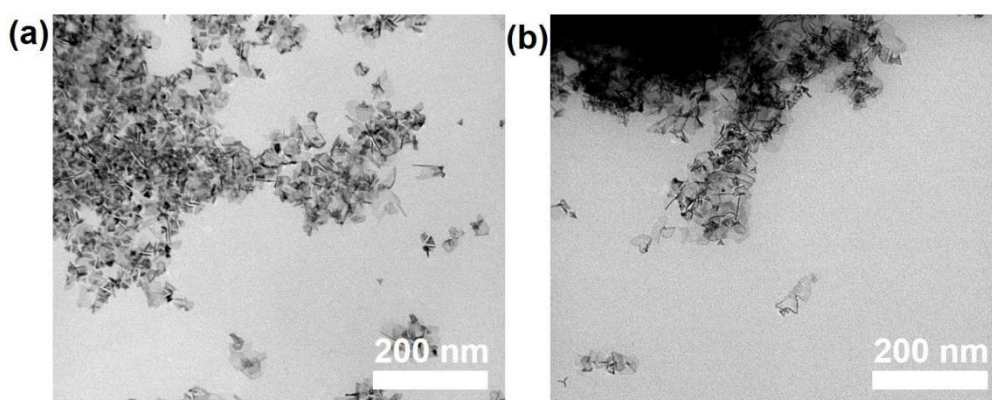

**Fig. S8** TEM images of Pd-Mo metallene (a) before and (c) after the ECH test.

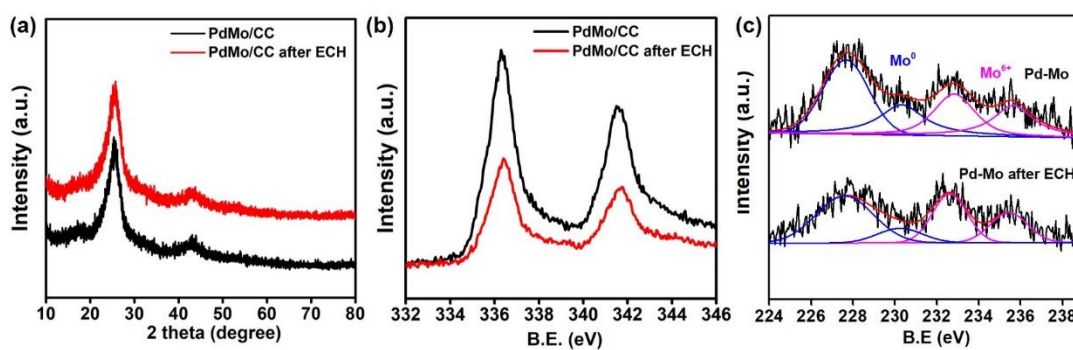

**Fig. S9** (a) XRD patterns, and (b) Pd 3d and (c) Mo 3d XPS profiles of Pd-Mo metallene before and after the ECH test.

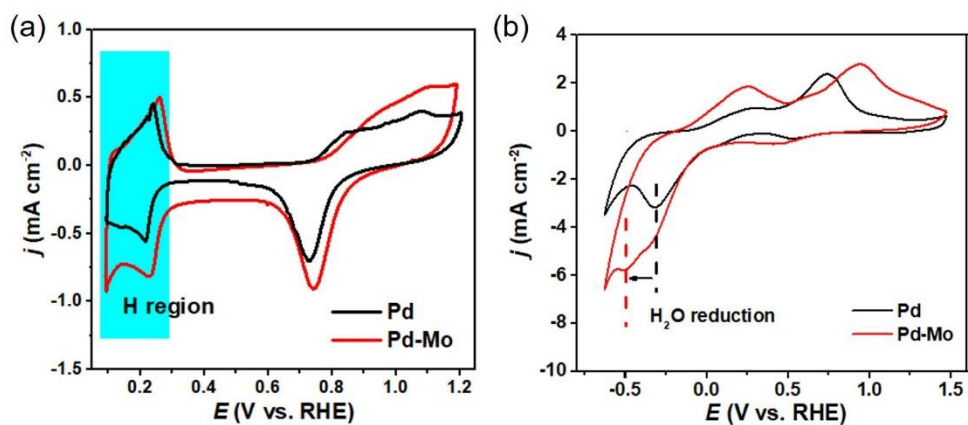

**Fig. S10** CVs of Pd and Pd-Mo metallene in (a) 0.05 M  $\text{H}_2\text{SO}_4$  and (b) 0.1 M  $\text{LiClO}_4$ .

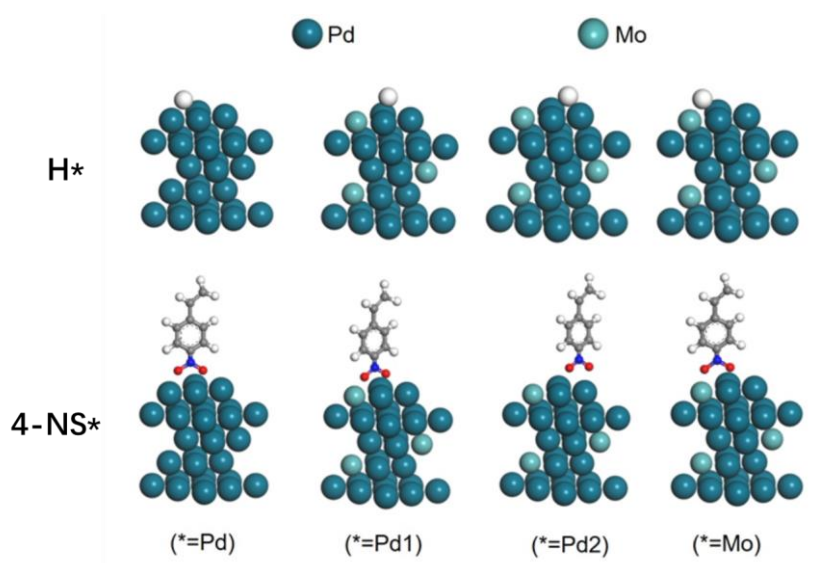

**Fig. S11** Adsorption configurations of  $\text{H}^*$  and  $4\text{-NS}^*$  on Pd and Pd-Mo.

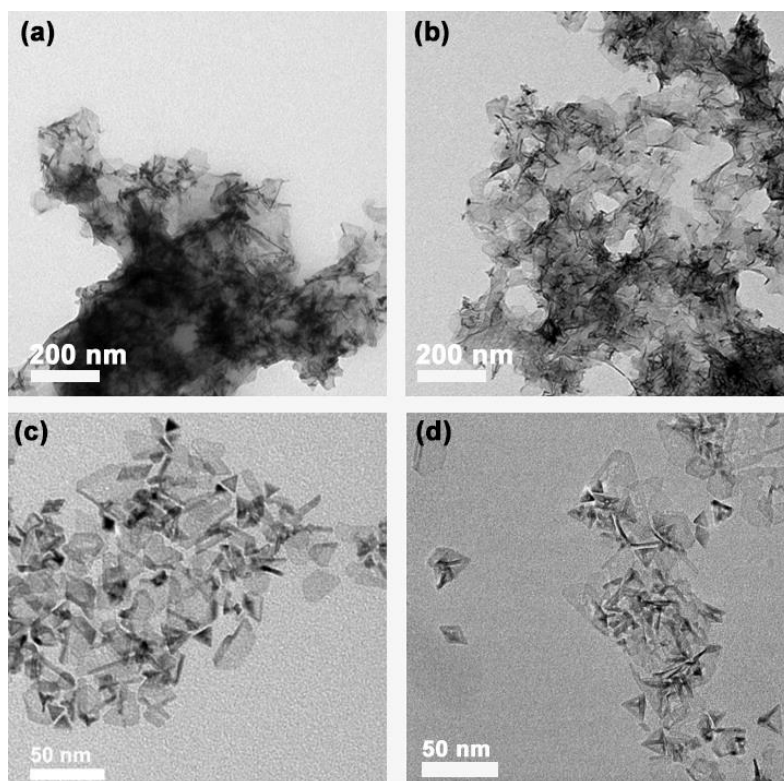

**Fig. S12** TEM images of (a) Pd-Cr, (b) Pd, (c) Pd-Mo and (d) Pd-W metallenes.

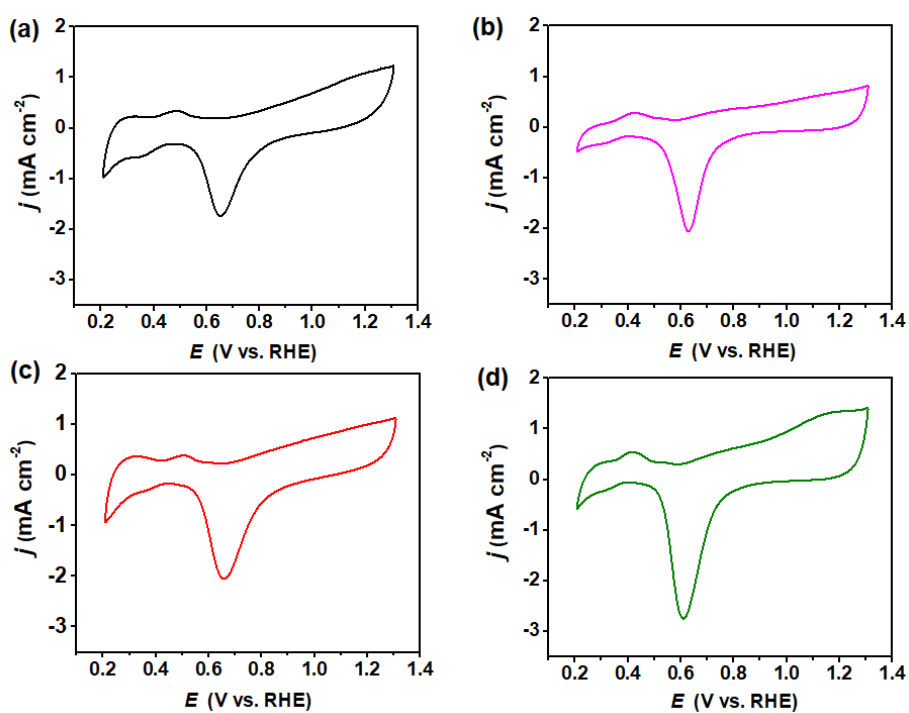

**Fig. S13** CVs of (a) Pd-Cr, (b) Pd, (c) Pd-Mo and (d) Pd-W metallenes in 0.1 M KOH. For this test, the samples were loaded onto a glassy carbon electrode with a mass loading of  $0.15 \text{ mg cm}^{-2}$ .



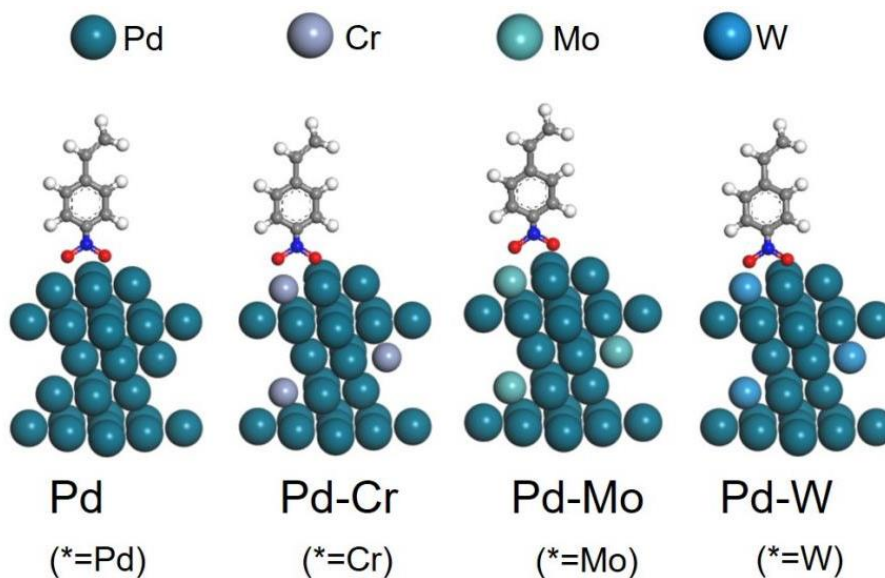

**Fig. S14** Adsorption configuration of 4-NS\* on Pd and Pd-M (M=Cr, Mo, W).

**Table S1** Composition of Pd-Mo with different concentration of Mo precursor.

| feeding Mo(CO) <sub>6</sub> (mg) | Pd (wt%) | Mo (wt%) | molar Mo/Pd |
|----------------------------------|----------|----------|-------------|
| 2                                | 97.1     | 2.9      | 0.03        |
| 4                                | 96.9     | 3.1      | 0.04        |
| 10                               | 96.2     | 3.8      | 0.04        |
| 15                               | 97.6     | 2.4      | 0.03        |

**Table S2** Composition of Pd-M.

|      | Pd (wt%) | Cr/Mo/W (wt%) |
|------|----------|---------------|
| Pd   | >99.9    | /             |
| PdCr | 97.7     | 2.3           |
| PdMo | 96.9     | 3.1           |
| PdW  | 97.3     | 2.7           |

**Table S3** Comparison of ECH performance (4-NS to 4-VA) for Pd-Mo metallene with other works.

| Catalyst                             | Time/Q     | solution                          | Driven condition  | F.E. | Sel. | Yield | Ref.             |
|--------------------------------------|------------|-----------------------------------|-------------------|------|------|-------|------------------|
| Pd-Mo metallene                      | 5 h/~216 C |                                   |                   | 84%  | 93%  | 63%   |                  |
| Pd metallene                         | 5 h        | 0.1 M LiClO <sub>4</sub> (pH 6.8) | -0.25 V vs RHE    | 68%  | 96%  | 59%   | <b>This work</b> |
| Pd-Cr metallene                      | 5 h        |                                   |                   | 77%  | 96%  | 51%   |                  |
| Pd-W metallene                       | 5 h        |                                   |                   | 82%  | 97%  | 76%   |                  |
| CuCo <sub>2</sub> O <sub>4</sub> /NF | 300 C      | 1M KOH                            | -1.0V vs SHE      | ~89% | ~99% | 93%   | [1]              |
| Co <sub>3</sub> S <sub>4-x</sub>     | 6 h        | 1M KOH                            | -1.0V vs Hg/HgO   | -    | 96%  | ~86%  | [2]              |
| CoP                                  | 6 h        | 1M KOH                            | -1.2 V vs Ag/AgCl | -    | 92%  | ~86%  | [3]              |

**Table S4** ECSA and specific rate of 4-NS reduction of Pd and Pd-M metallenes (in initial 1h).

|                                                                                            | Pd     | Pd-Cr  | Pd-Mo  | Pd-W   |
|--------------------------------------------------------------------------------------------|--------|--------|--------|--------|
| ECSA (cm <sup>2</sup> mg <sup>-1</sup> )                                                   | 111.60 | 100.41 | 123.46 | 129.71 |
| $r_{4-NS}$ ( $\times 10^{-2}$ mmol h <sup>-1</sup> )                                       | 5.94   | 5.76   | 11.76  | 10.68  |
| $r_{4-NS,ECSA}$ ( $\times 10^{-5}$ mmol h <sup>-1</sup> cm <sub>ECSA</sub> <sup>-2</sup> ) | 53.23  | 57.36  | 95.25  | 82.34  |

## Reference

- [1] ACS Catal. 2022, 12, 58  
 [2] CCS Chem., 2021, 3(1): 507-515.  
 [3] Nat. Sci. Rev., 2020, 7(2): 285-295.
